# Supplementary material
Source: Royal Society of Chemistry journal article supplement (https://www.rsc.org/suppdata/dt/1999/3335/904626gf1.pdf)

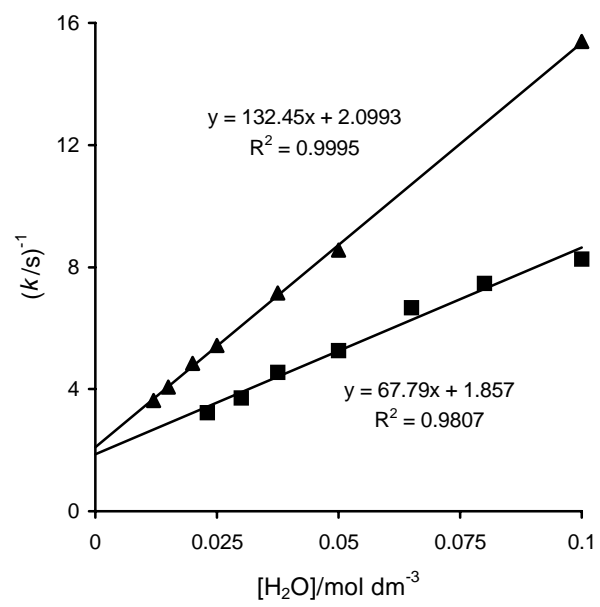

Supplement: Supplementary file 1 [file 904626gf1.pdf]
